# Supplementary material
Source: Research Square preprint supplement (doi:10.21203/rs.3.rs-9315253/v1)
Supplement: Supplementary file 1 [file 29506782ae9dd91475ebc74c.pdf]

**B**

|                                  | Angola | Benin  | Burkina Faso | Cameroon | Central African Republic | Chad   | Cote d'Ivoire | Democratic Republic of the Congo | Gabon  | Ghana  | Guinea | Liberia | Malawi | Mauritania | Niger  | Nigeria | Rwanda | Sierra Leone | Somalia | South Africa | Sudan  | Togo   | Uganda |  |
|----------------------------------|--------|--------|--------------|----------|--------------------------|--------|---------------|----------------------------------|--------|--------|--------|---------|--------|------------|--------|---------|--------|--------------|---------|--------------|--------|--------|--------|--|
| Angola                           | -      |        |              |          |                          |        |               |                                  |        |        |        |         |        |            |        |         |        |              |         |              |        |        |        |  |
| Benin                            | 0.0301 | 0.0133 |              |          |                          |        |               |                                  |        |        |        |         |        |            |        |         |        |              |         |              |        |        |        |  |
| Burkina Faso                     | 0.0304 | 0.0166 | 0.0000       |          |                          |        |               |                                  |        |        |        |         |        |            |        |         |        |              |         |              |        |        |        |  |
| Cameroon                         | 0.0336 | 0.0179 | 0.0171       | 0.0143   |                          |        |               |                                  |        |        |        |         |        |            |        |         |        |              |         |              |        |        |        |  |
| Central African Republic         | 0.0269 | 0.0134 | 0.0108       | 0.0140   | 0.0052                   |        |               |                                  |        |        |        |         |        |            |        |         |        |              |         |              |        |        |        |  |
| Chad                             | 0.0262 | 0.0095 | 0.0097       | 0.0106   | 0.0069                   | 0.0014 |               |                                  |        |        |        |         |        |            |        |         |        |              |         |              |        |        |        |  |
| Cote d'Ivoire                    | 0.0263 | 0.0128 | 0.0083       | 0.0138   | 0.0076                   | 0.0064 | 0.0065        |                                  |        |        |        |         |        |            |        |         |        |              |         |              |        |        |        |  |
| Democratic Republic of the Congo | 0.0343 | 0.0284 | 0.0262       | 0.0294   | 0.0228                   | 0.0220 | 0.0224        | 0.0165                           |        |        |        |         |        |            |        |         |        |              |         |              |        |        |        |  |
| Gabon                            | 0.0280 | 0.0134 | 0.0110       | 0.0108   | 0.0067                   | 0.0060 | 0.0077        | 0.0197                           | 0.0068 |        |        |         |        |            |        |         |        |              |         |              |        |        |        |  |
| Ghana                            | 0.0313 | 0.0145 | 0.0160       | 0.0185   | 0.0130                   | 0.0105 | 0.0125        | 0.0282                           | 0.0132 | 0.0185 |        |         |        |            |        |         |        |              |         |              |        |        |        |  |
| Guinea                           | 0.0272 | 0.0133 | 0.0060       | 0.0141   | 0.0078                   | 0.0067 | 0.0060        | 0.0224                           | 0.0077 | 0.0127 | 0.0026 |         |        |            |        |         |        |              |         |              |        |        |        |  |
| Liberia                          | 0.0280 | 0.0142 | 0.0113       | 0.0140   | 0.0086                   | 0.0075 | 0.0082        | 0.0236                           | 0.0086 | 0.0137 | 0.0084 | -       |        |            |        |         |        |              |         |              |        |        |        |  |
| Malawi                           | 0.0282 | 0.0188 | 0.0160       | 0.0193   | 0.0131                   | 0.0121 | 0.0129        | 0.0120                           | 0.0097 | 0.0185 | 0.0124 | 0.0137  | -      |            |        |         |        |              |         |              |        |        |        |  |
| Mauritania                       | 0.0255 | 0.0119 | 0.0045       | 0.0125   | 0.0063                   | 0.0052 | 0.0045        | 0.0213                           | 0.0062 | 0.0114 | 0.0015 | 0.0068  | 0.0113 | -          |        |         |        |              |         |              |        |        |        |  |
| Niger                            | 0.0137 | 0.0242 | 0.0255       | 0.0288   | 0.0221                   | 0.0214 | 0.0210        | 0.0296                           | 0.0229 | 0.0247 | 0.0224 | 0.0232  | 0.0233 | 0.0208     | -      |         |        |              |         |              |        |        |        |  |
| Nigeria                          | 0.0261 | 0.0132 | 0.0127       | 0.0149   | 0.0101                   | 0.0065 | 0.0096        | 0.0245                           | 0.0096 | 0.0138 | 0.0099 | 0.0108  | 0.0148 | 0.0084     | 0.0209 | 0.0103  |        |              |         |              |        |        |        |  |
| Rwanda                           | 0.0045 | 0.0268 | 0.0271       | 0.0303   | 0.0237                   | 0.0230 | 0.0231        | 0.0310                           | 0.0246 | 0.0280 | 0.0239 | 0.0247  | 0.0249 | 0.0223     | 0.0106 | 0.0229  | 0.0030 |              |         |              |        |        |        |  |
| Sierra Leone                     | 0.0272 | 0.0133 | 0.0106       | 0.0136   | 0.0078                   | 0.0067 | 0.0075        | 0.0229                           | 0.0078 | 0.0129 | 0.0076 | 0.0045  | 0.0129 | 0.0060     | 0.0224 | 0.0100  | 0.0239 | 0.0045       |         |              |        |        |        |  |
| Somalia                          | 0.0280 | 0.0142 | 0.0113       | 0.0149   | 0.0086                   | 0.0075 | 0.0082        | 0.0236                           | 0.0086 | 0.0137 | 0.0084 | 0.0092  | 0.0137 | 0.0068     | 0.0232 | 0.0107  | 0.0247 | 0.0084       | -       |              |        |        |        |  |
| South Africa                     | 0.0443 | 0.0341 | 0.0311       | 0.0337   | 0.0277                   | 0.0269 | 0.0278        | 0.0260                           | 0.0251 | 0.0339 | 0.0271 | 0.0284  | 0.0140 | 0.0261     | 0.0390 | 0.0299  | 0.0408 | 0.0277       | 0.0284  | -            |        |        |        |  |
| Sudan                            | 0.0137 | 0.0205 | 0.0208       | 0.0239   | 0.0174                   | 0.0166 | 0.0171        | 0.0265                           | 0.0180 | 0.0216 | 0.0176 | 0.0184  | 0.0186 | 0.0160     | 0.0138 | 0.0177  | 0.0106 | 0.0176       | 0.0184  | 0.0342       | 0.0000 |        |        |  |
| Togo                             | 0.0260 | 0.0123 | 0.0094       | 0.0129   | 0.0067                   | 0.0056 | 0.0064        | 0.0217                           | 0.0064 | 0.0117 | 0.0064 | 0.0072  | 0.0118 | 0.0049     | 0.0212 | 0.0089  | 0.0227 | 0.0064       | 0.0072  | 0.0261       | 0.0165 | 0.0051 |        |  |
| Uganda                           | 0.0051 | 0.0258 | 0.0262       | 0.0294   | 0.0227                   | 0.0220 | 0.0221        | 0.0301                           | 0.0236 | 0.0270 | 0.0230 | 0.0238  | 0.0239 | 0.0214     | 0.0097 | 0.0220  | 0.0021 | 0.0230       | 0.0238  | 0.0397       | 0.0097 | 0.0218 | 0.0013 |  |

**A**

|               | Africa | Asia   | Europe | North America | Oceania | South America |
|---------------|--------|--------|--------|---------------|---------|---------------|
| Africa        | 0.0125 |        |        |               |         |               |
| Asia          | 0.0232 | 0.0122 |        |               |         |               |
| Europe        | 0.0193 | 0.0162 | 0.0146 |               |         |               |
| North America | 0.0212 | 0.0166 | 0.0168 | 0.0150        |         |               |
| Oceania       | 0.0220 | 0.0120 | 0.0142 | 0.0146        | 0.0103  |               |
| South America | 0.0193 | 0.0097 | 0.0117 | 0.0128        | 0.0076  | 0.0024        |
