# Supplementary material
Source: Research Square preprint supplement (doi:10.21203/rs.3.rs-9315253/v1)

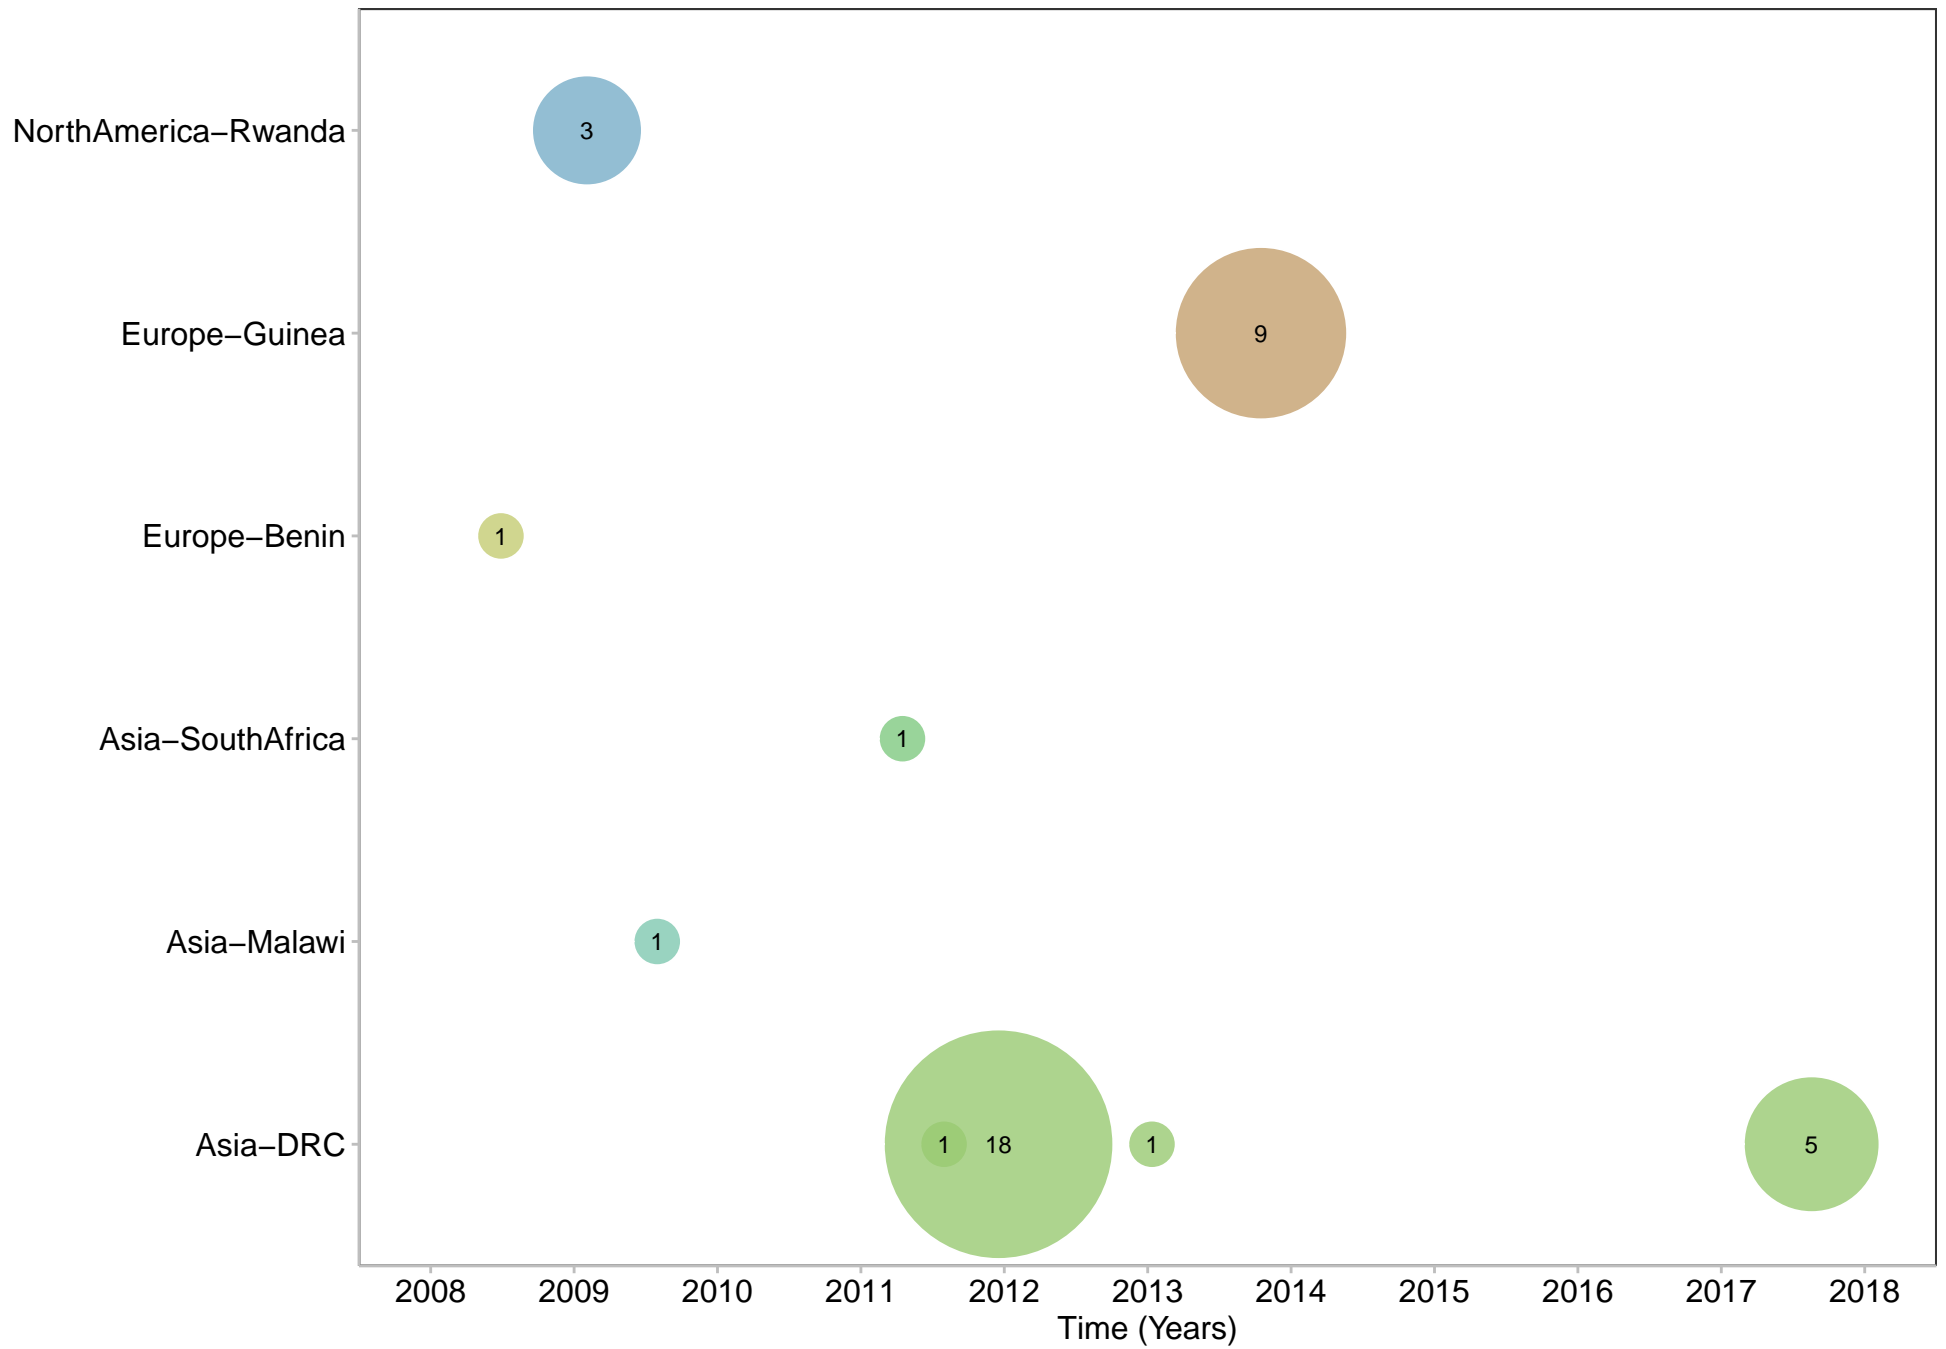

Supplement: Supplementary file 2 [file ace7a960c278657eed524ffe.pdf]

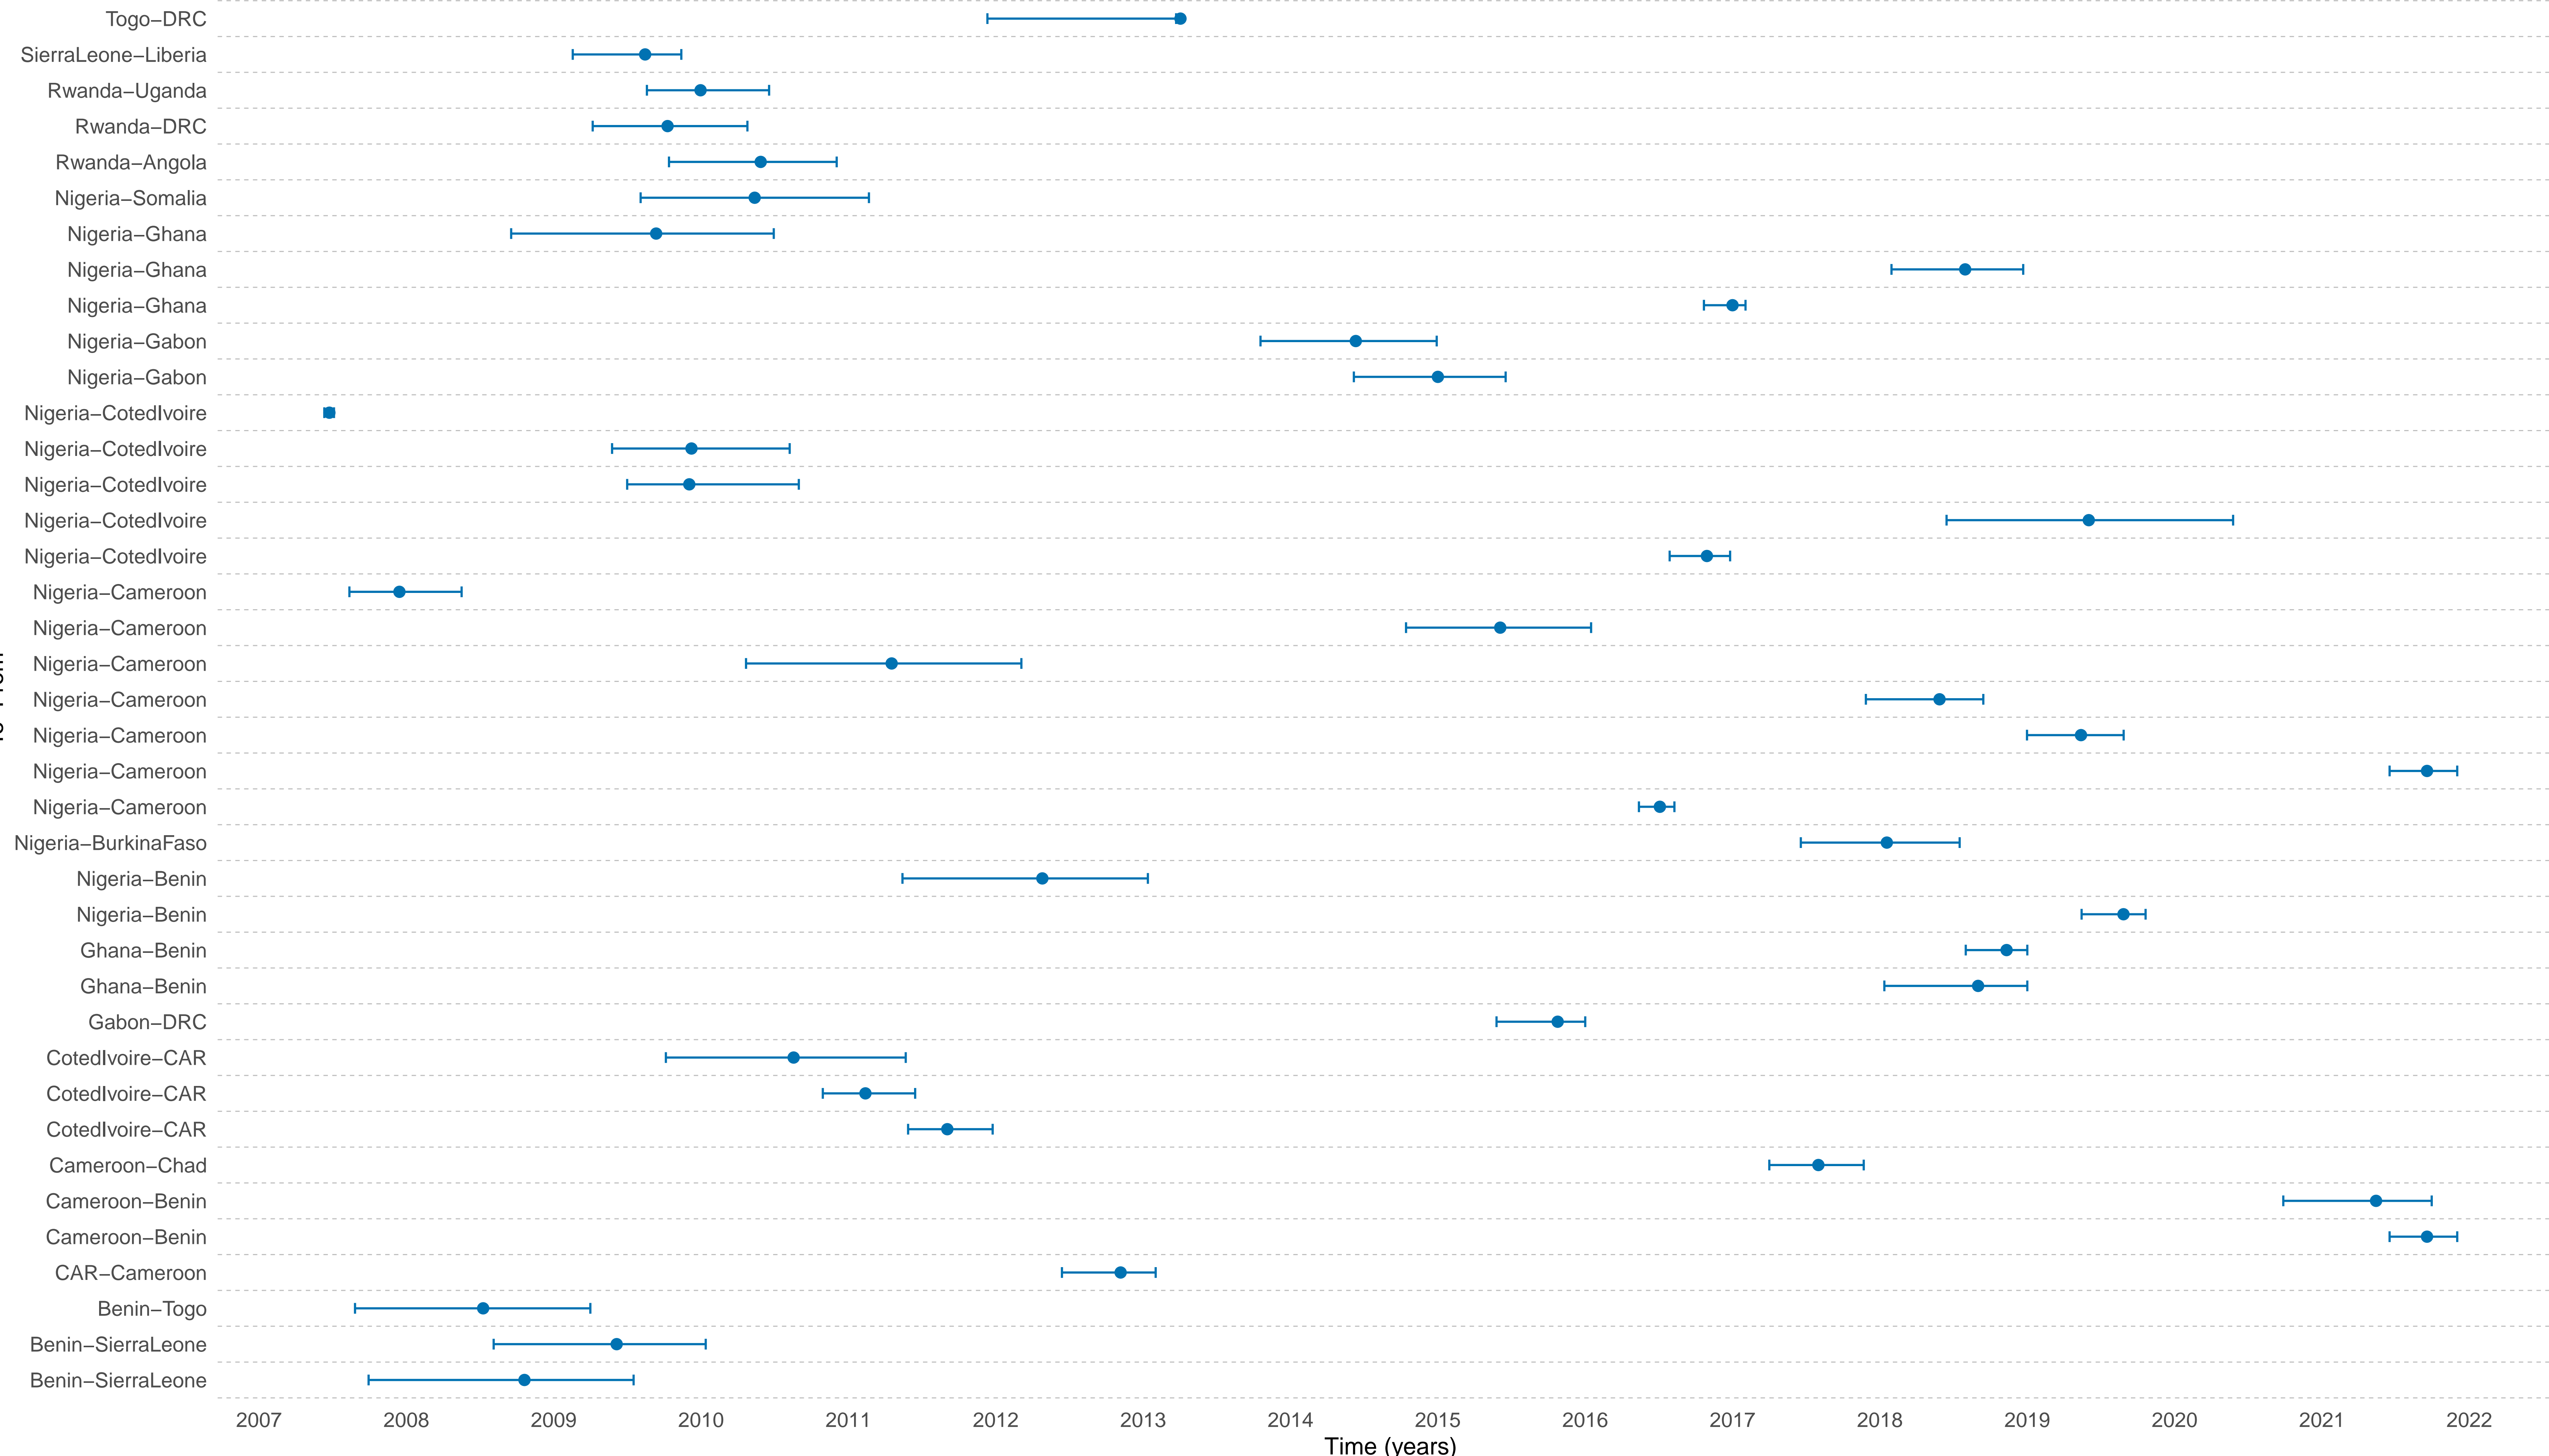

Supplement: Supplementary file 3 [file c9d2bcec3068e86a86d976e1.pdf]
